# Supplementary material for: Pan-cancer single-cell analysis reveals the heterogeneity and plasticity of cancer-associated fibroblasts in the tumor microenvironment
Source: PubMed Central journal article supplement (PMC9636408; doi:10.1038/s41467-022-34395-2), 2022-11-04
Supplement: 41467_2022_34395_MOESM1_ESM.pdf [file 41467_2022_34395_MOESM1_ESM.pdf]

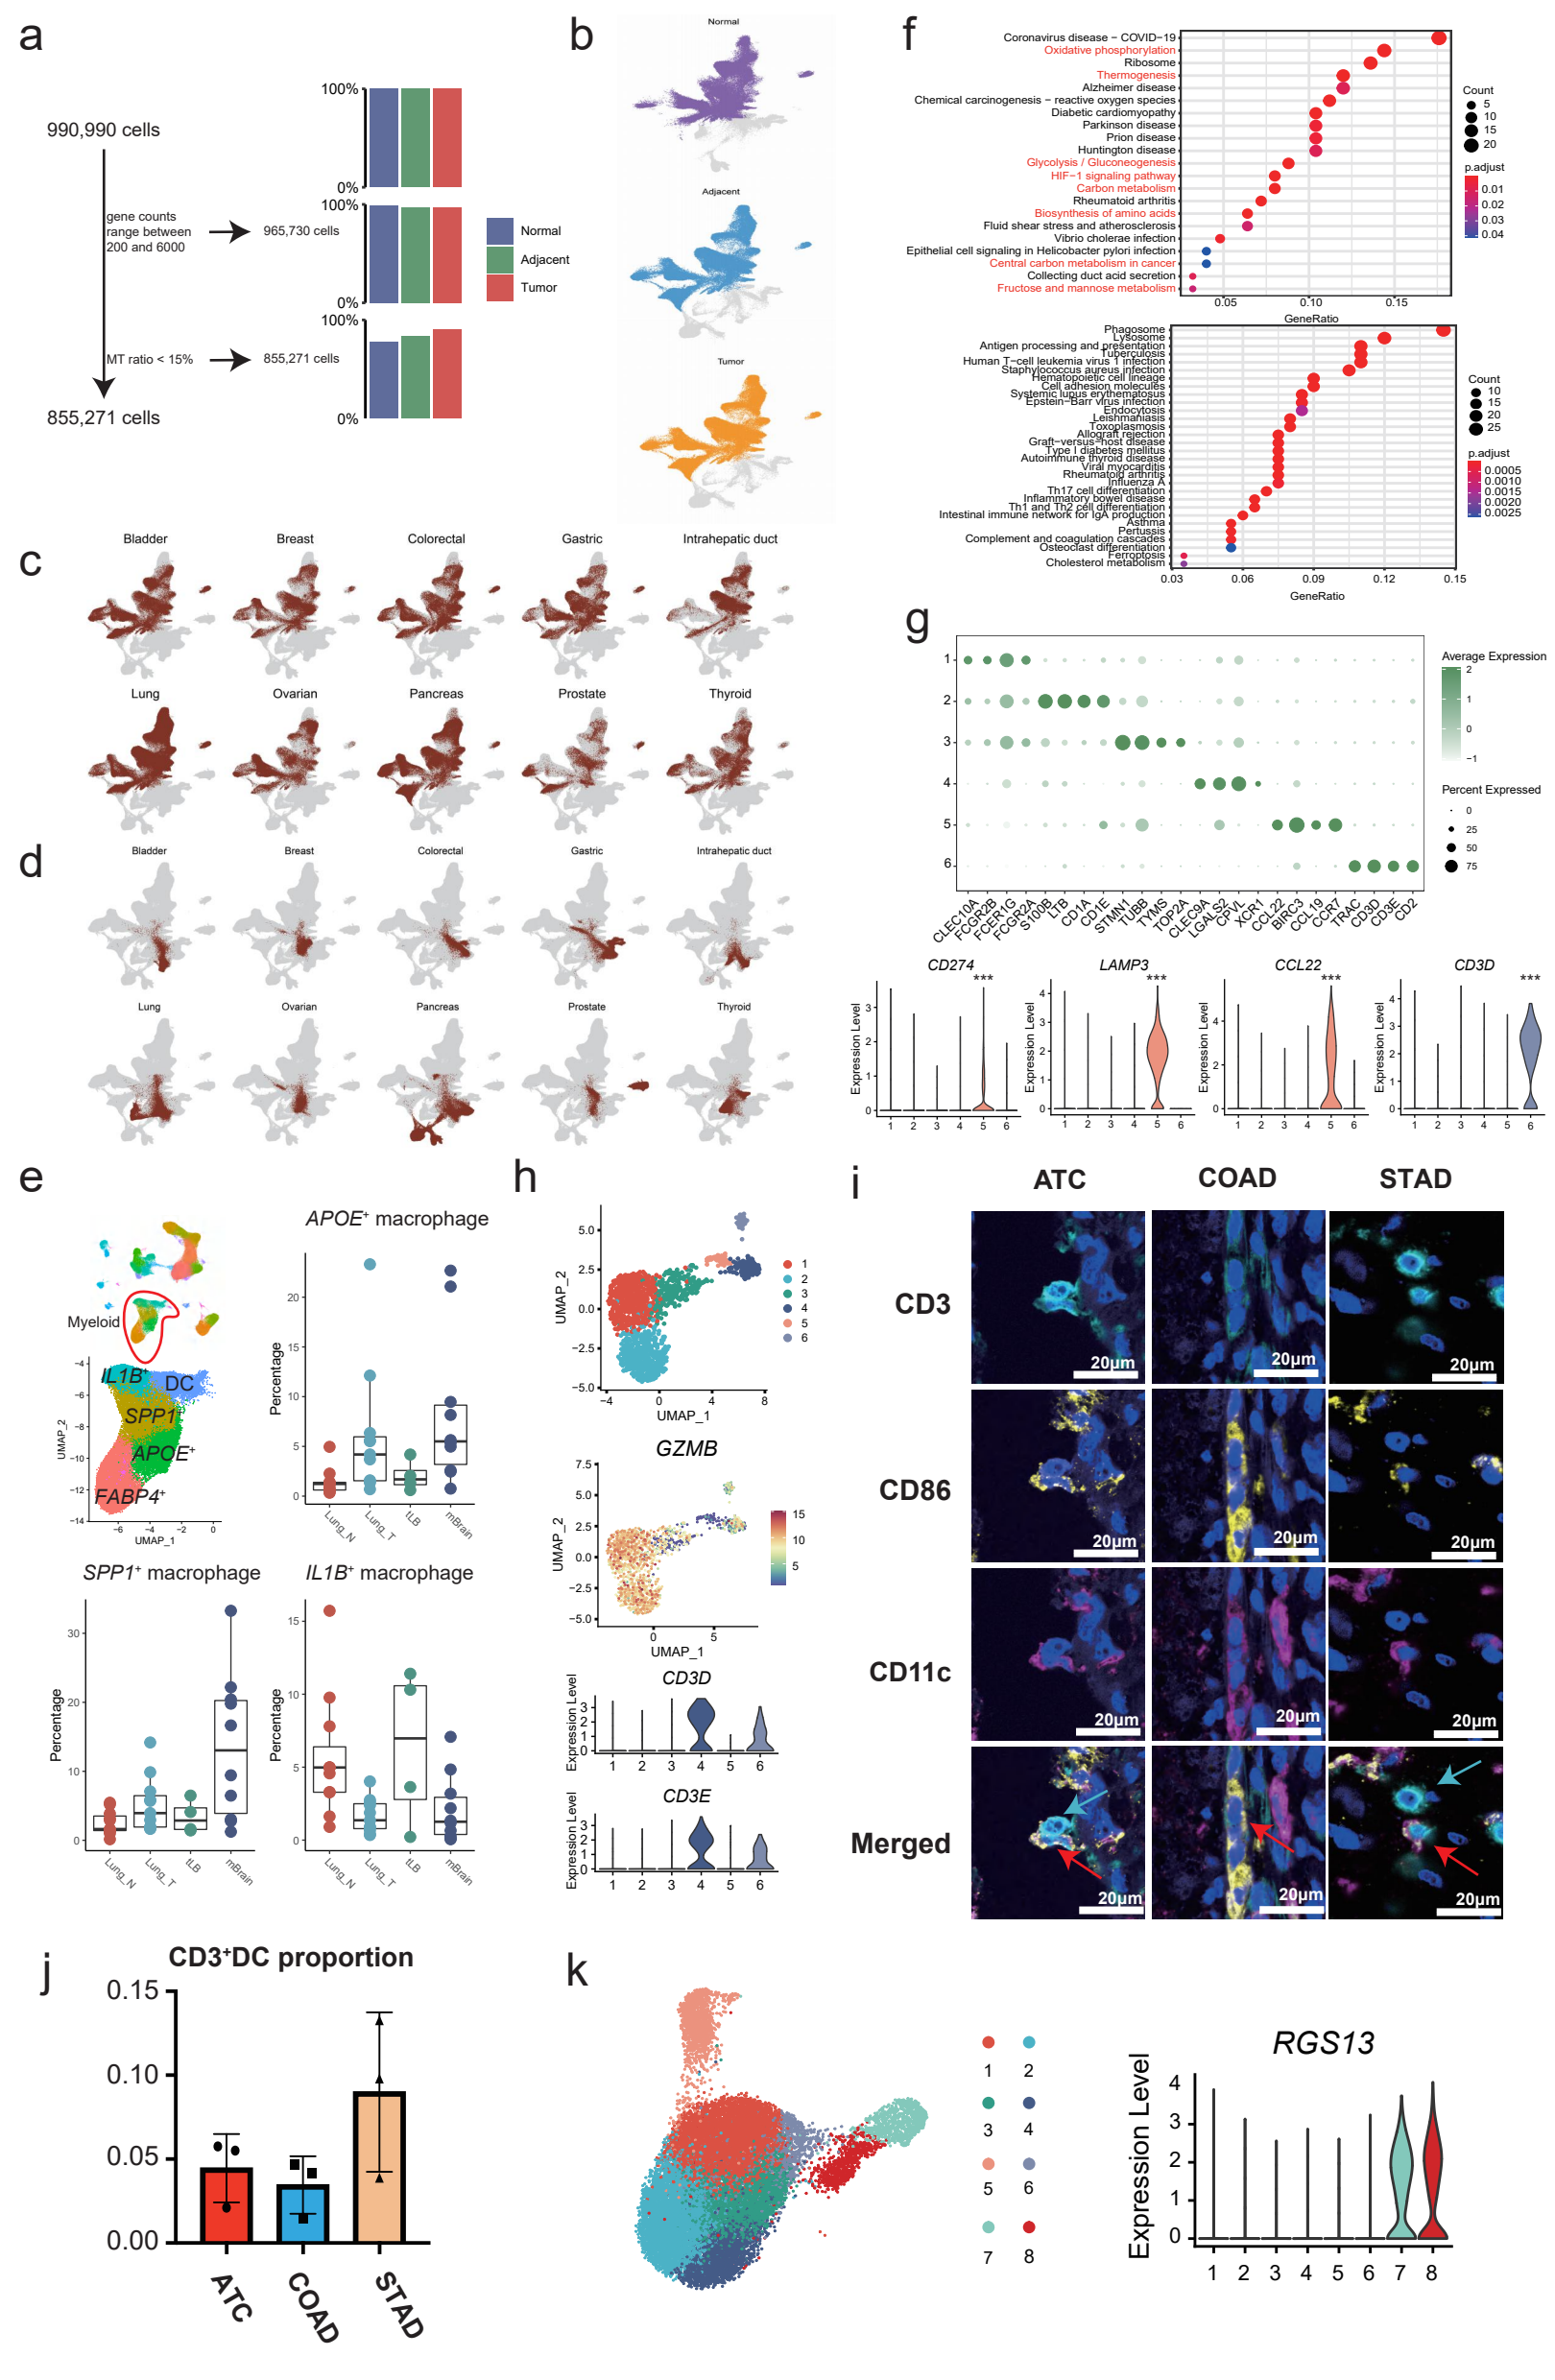

**Figure S1. Quality control and overall/subcluster single-cell transcriptome profile.** **a.** Quality check pipeline of the pan-cancer single-cell profile. **b/c.** Distribution of TME cells represented by tissue types and malignant status. **d.** Distribution of epithelial cells represented by tissue types. **e.** The UMAP clustering result of myeloid cells. The alteration in the proportion of *IL1B*<sup>+</sup>, *SPP1*<sup>+</sup> and *APOE*<sup>+</sup> macrophages along adjacent normal lung (Lung\_N: n = 11), lung tumor (Lung\_T: n = 11), advanced stage of tumor (tLB: n = 4), and brain metastasized (mBrain: n = 10) tissues. The box is bounded by the first and third quartile with a horizontal line at the median and whiskers extend to the maximum and minimum value. **f.** Top pathways enriched in *SPP1*<sup>+</sup> TAMs (upper) and *C1QC*<sup>+</sup> TAMs (lower) as determined by KEGG. **g.** Bubble plot of markers in each dendrite cell (DC) subcluster and the violin plot of *CD274*, *LAMP3*, *CCL22* and *CD3D*, Kruskal-Wallis two-sided test is used to test the significance of gene expression level among different DC cells clusters. \*\*\*:  $p < 0.001$ . **h.** Subclusters of plasmacytoid DCs (pDCs) and feature plot and violin plot of *GZMB*, *CD3D*, and *CD3E*. **i/j.** Confocal images of multiplexed immunofluorescence staining of CD3, CD11c and CD86 in anaplastic thyroid (n = 3), gastric (n = 3) and colorectal cancer (n = 3). The quantification results in each of them. The blue arrow indicates CD3<sup>+</sup> T-cell, and the red arrow indicates CD3<sup>+</sup> DCs (CD3<sup>+</sup>CD11c<sup>+</sup>CD86<sup>+</sup>). Scale bar: 20  $\mu$ m. Multiplexed immunofluorescence assays are performed twice on tumor samples following assay optimization. **k.** Subclustering tumor-infiltrated B-cell and violin plot with specific gene expression in subclusters. Source data are provided as a Source Data file.

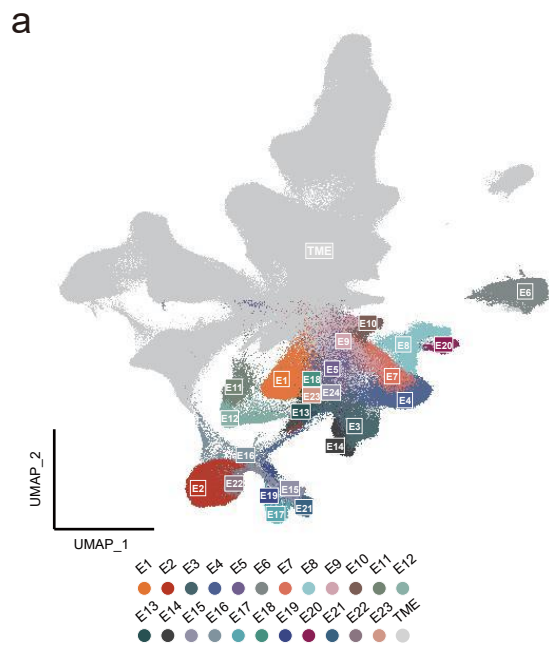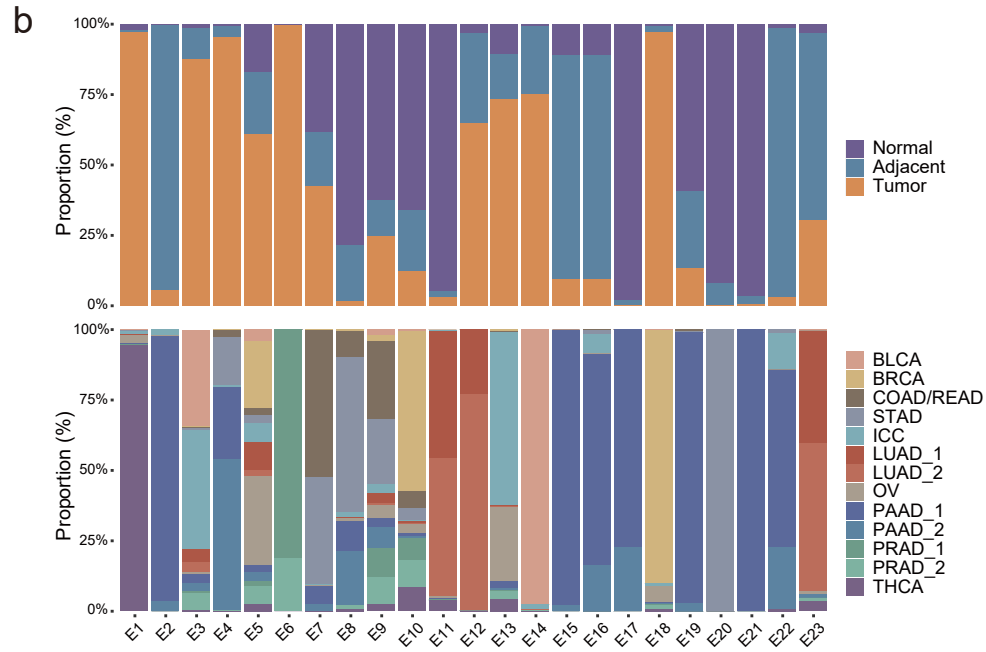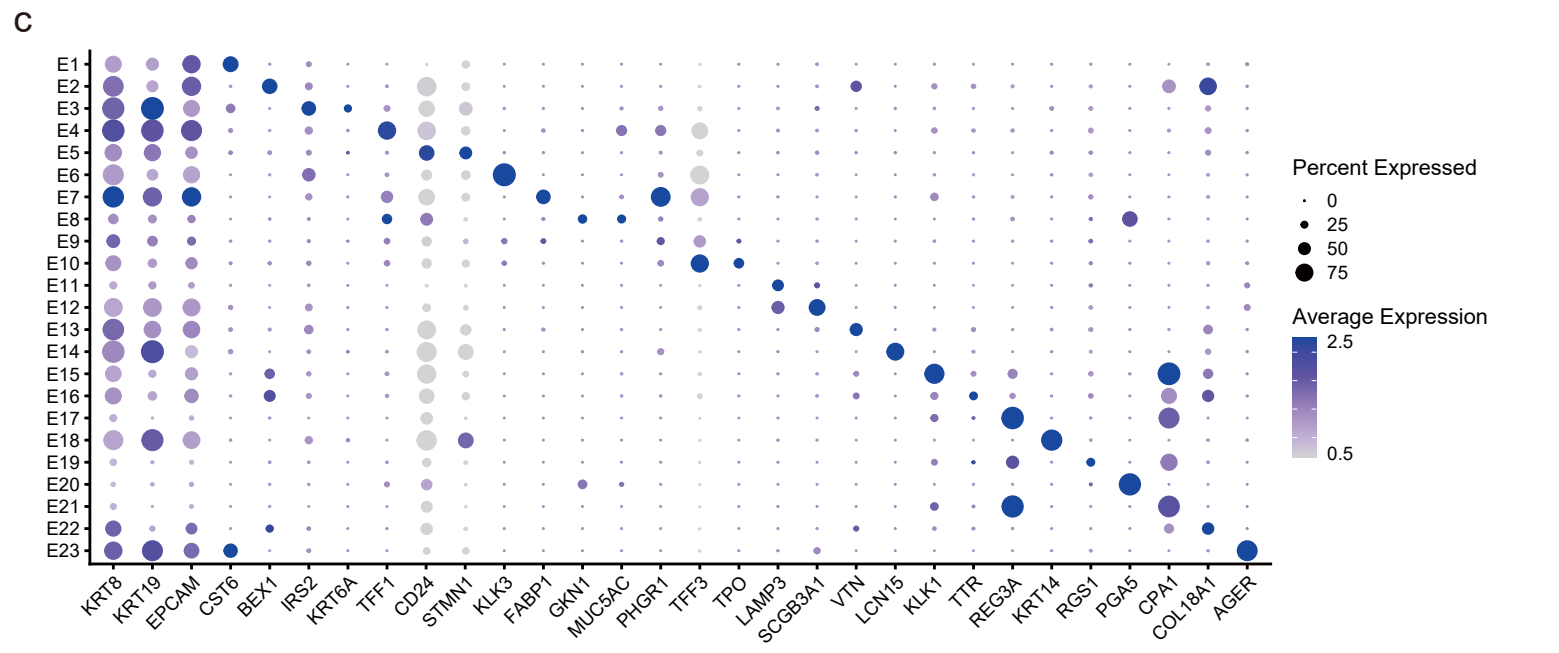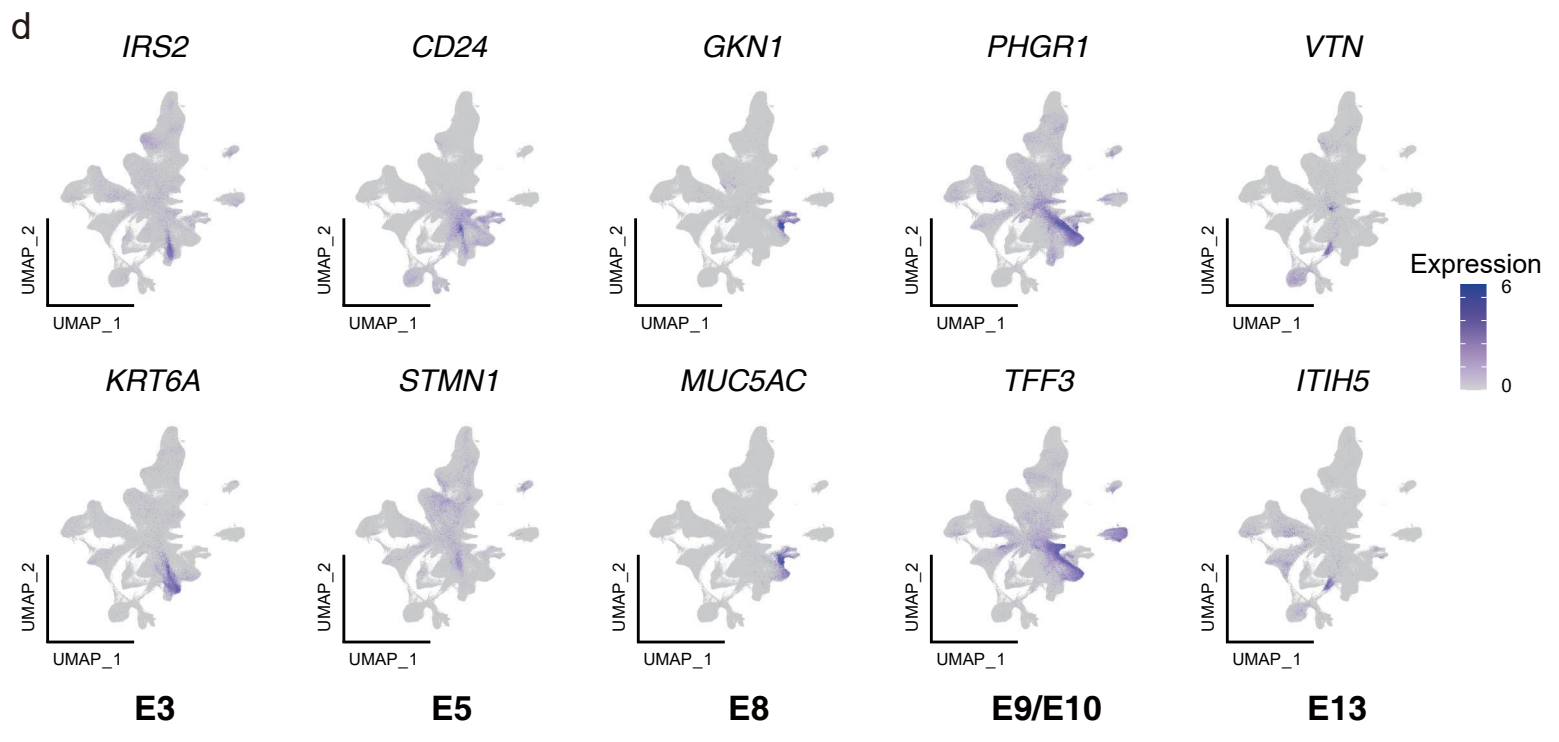

**Figure S2. Profile of epithelial clusters across different cancer types.** **a.** The clustering of epithelial cells in pan-cancer profile. **b.** Histogram of the composition proportion of different tissue types in each epithelial cluster. **c.** Bubble plot of specific expressed marker in each epithelial cluster. **d.** The feature plot of selected genes in specific epithelial clusters (E3, E5, E8, E9, E10 and E13).



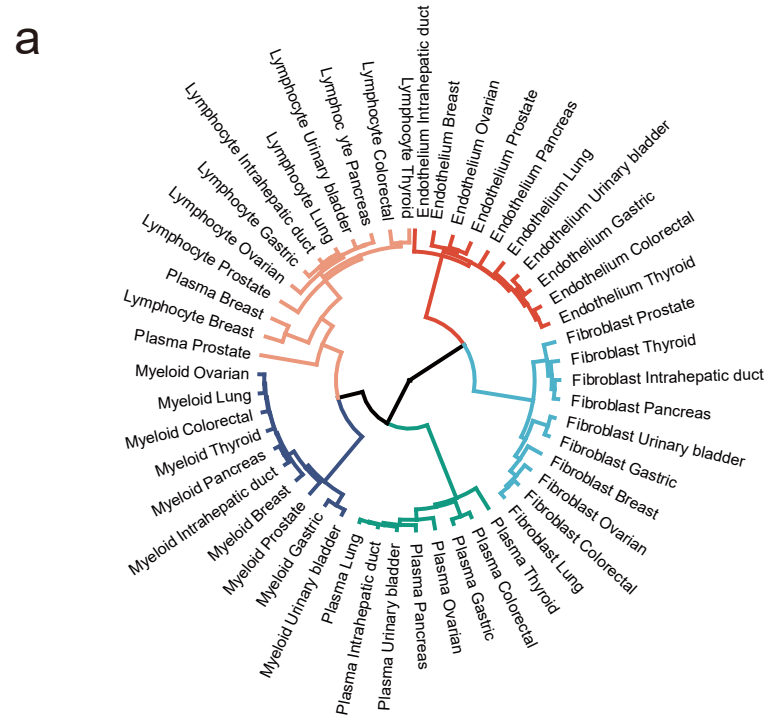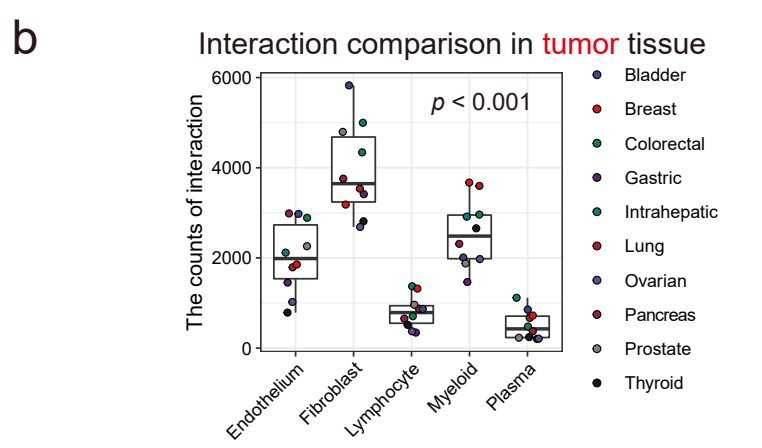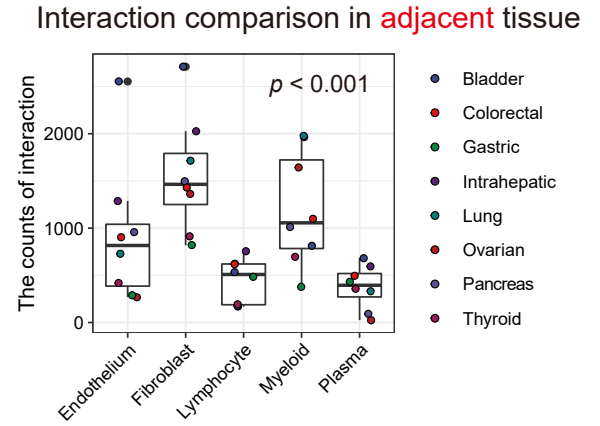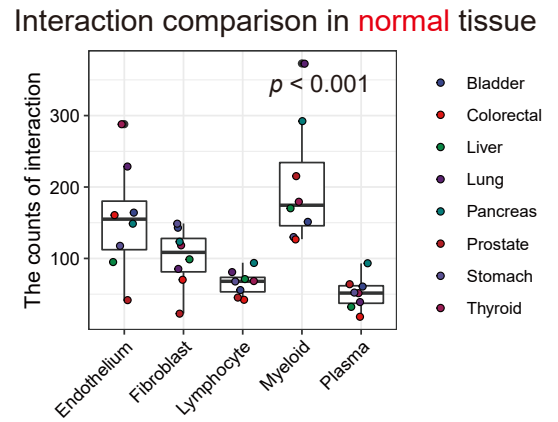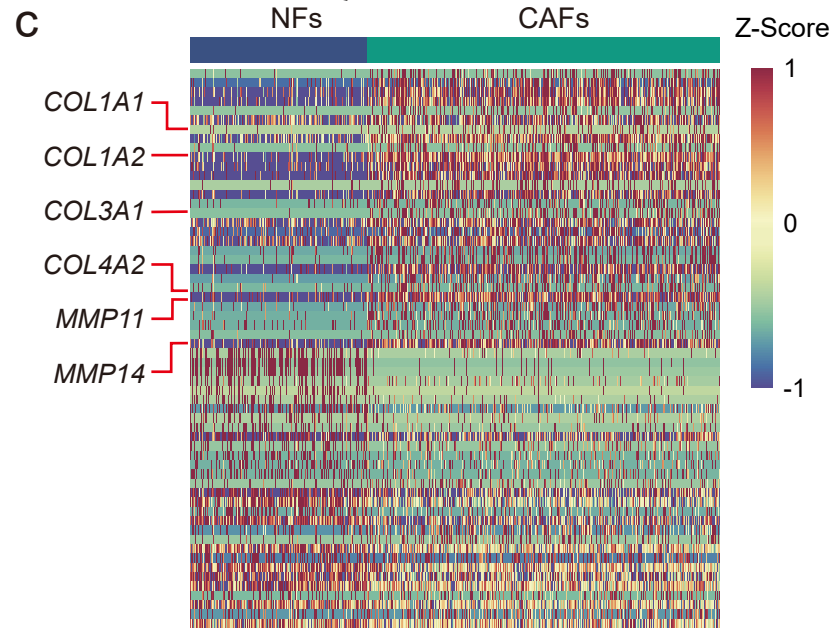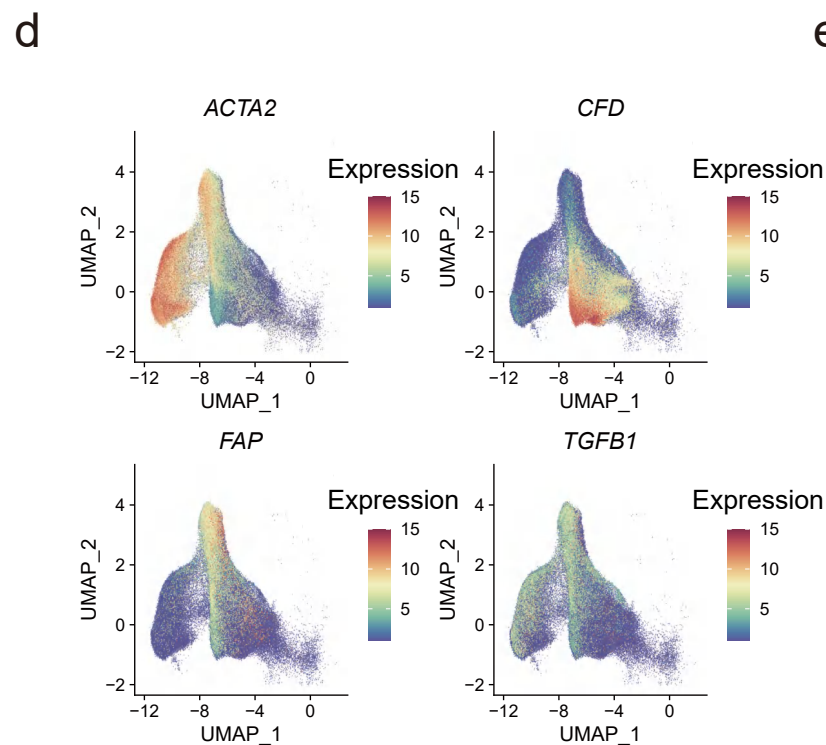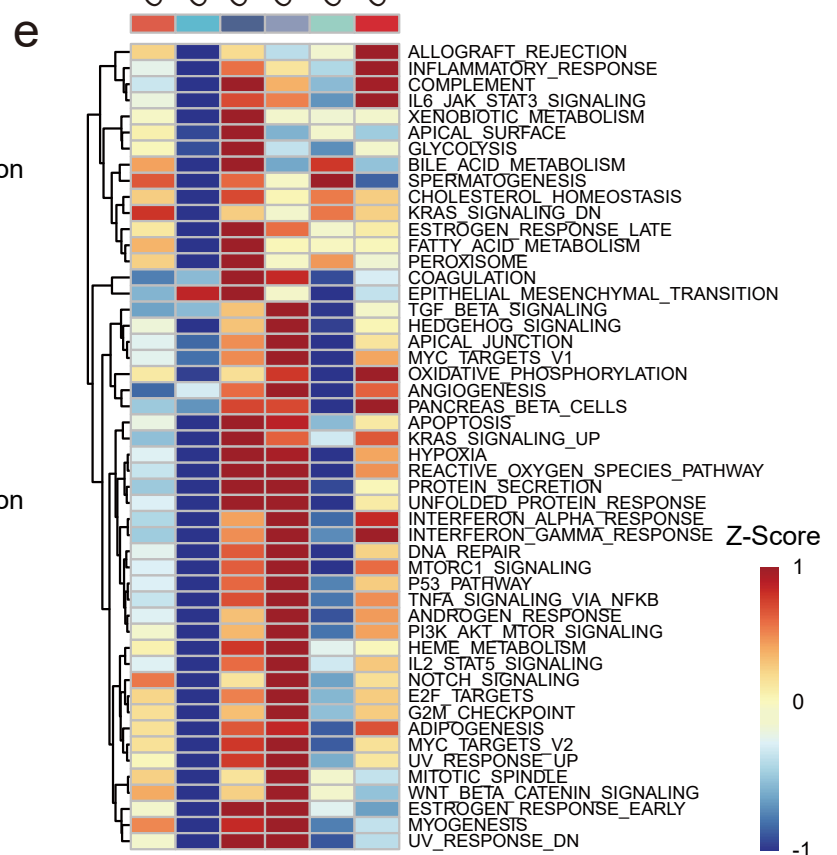

**Figure S3. General characteristics of CAF.** **a.** Hierarchical clustering of TME components in all cancer types. **b.** Tissue type-specific interaction quantification of the main TME components represented in tumor (Fibroblast: n = 10, Lymphocyte: n = 10, Myeloid: n = 10, Endothelium: n = 10, Plasma: n = 10), adjacent (Fibroblast: n = 8, Lymphocyte: n = 8, Myeloid: n = 8, Endothelium: n = 8, Plasma: n = 8), and normal tissues (Fibroblast: n = 7, Lymphocyte: n = 7, Myeloid: n = 7, Endothelium: n = 7, Plasma: n = 7). The box is bounded by the first and third quartile with a horizontal line at the median and whiskers extend to the maximum and minimum value, Anova two-sided test is used to test the significance of counts of interaction among different cell type categories. Tumor  $p$ -value is  $3.93 \times 10^{-14}$ . Adjacent  $p$ -value is  $2.38 \times 10^{-4}$ , Normal tissue  $p$ -value is  $8.19 \times 10^{-5}$ . **c.** Differentially expressed genes between cancer-associated fibroblasts (CAFs) and normal fibroblasts (NFs). **d.** Feature plots of *ACTA2*, *ACTG2*, *FAP*, and *TGFB1* in the fibroblast component of the TME. **e.** Gene ontology enrichment of all components of CAFs. Source data are provided as a Source Data file.

a

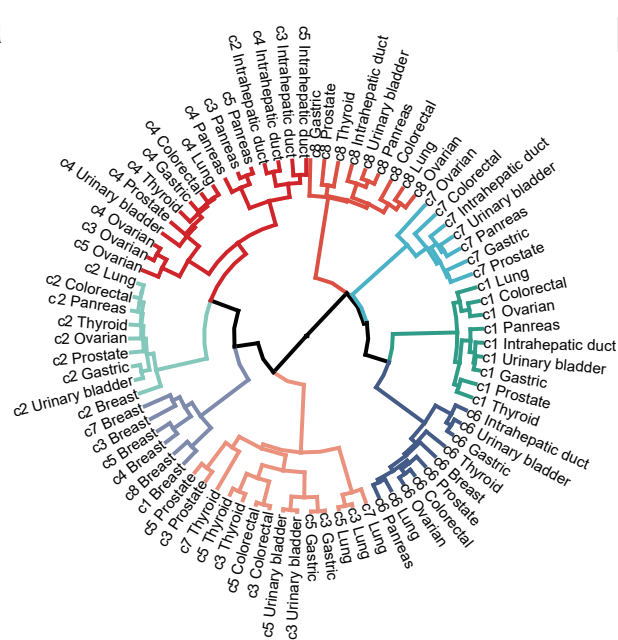

b

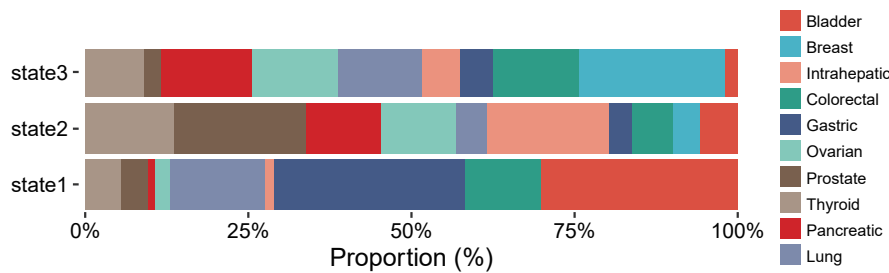

d

EMT scores

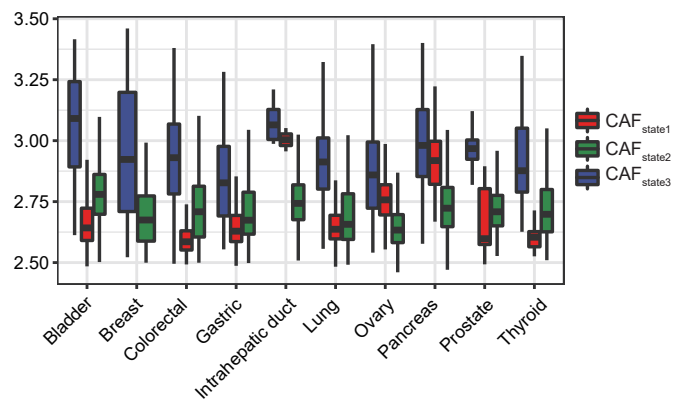Expression levels of *CREB3L1*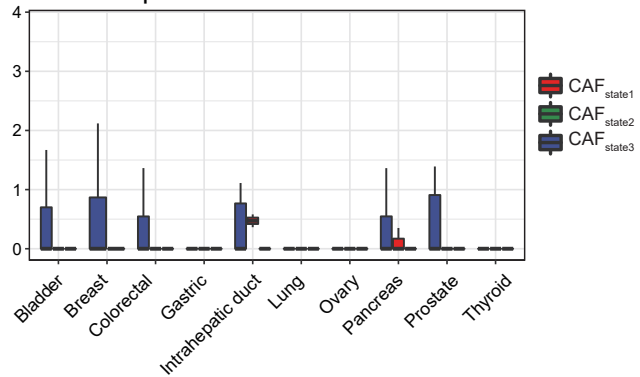

c

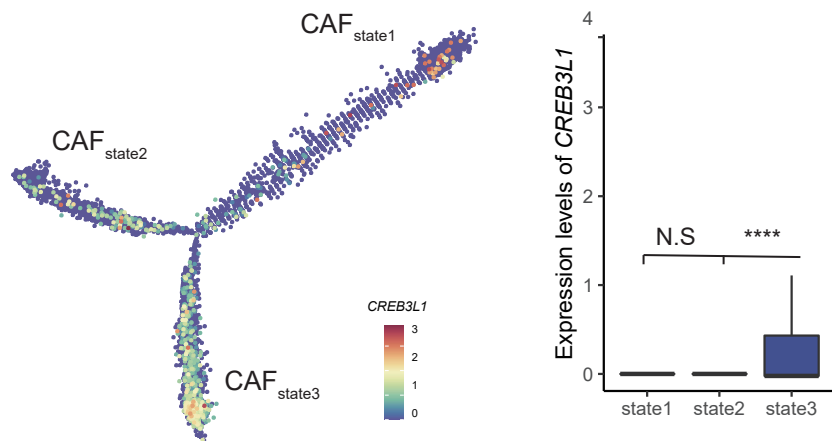

e

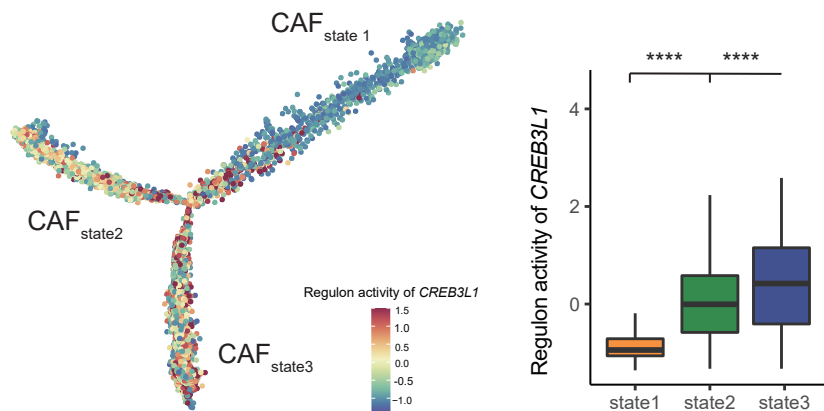

**Figure S4. Characteristics of three CAF states.** **a.** Hierarchical clustering of fibroblasts in all cancer types. **b.** The constitution ratio of each cancer type in each state. **c.** Left: *CREB3L1* expression was enriched along the evolutionary trajectory of CAFs. Right: comparison of *CREB3L1* expression among the three CAF states, state1: n = 2133, state2: n = 2476, state3: n = 2891, The box is bounded by the first and third quartile with a horizontal line at the median and whiskers extend to the maximum and minimum value. Mann–Whitney two-sided test is used to test the significance of expression level of *CREB3L1* between CAF states. \*\*\*\*:  $p < 0.0001$ . **d.** Comparison of the EMT score and *CREB3L1* expression among the three states of CAFs in each tissue type, Bladder: n = 1448, Breast: n = 454, Colorectal: n = 706, Gastric: n = 821, Intrahepatic duct: n = 59, Lung: n = 668, Ovary: n = 1262, Pancreas: n = 1659, Prostate: n = 168, Thyroid: n = 248. **e.** Left: *CREB3L1* downstream target set enriched along the evolutionary trajectory of CAFs. Right: comparison of the downstream target set of *CREB3L1* among the three CAF states, state1: n = 2133, state2: n = 2476, state3: n = 2891. The box is bounded by the first and third quartile with a horizontal line at the median and whiskers extend to the maximum and minimum value. Mann–Whitney two-sided test is used to test the significance of regulon activity of *CREB3L1* between CAF states. \*\*\*\*:  $p < 0.0001$ . Source data are provided as a Source Data file.

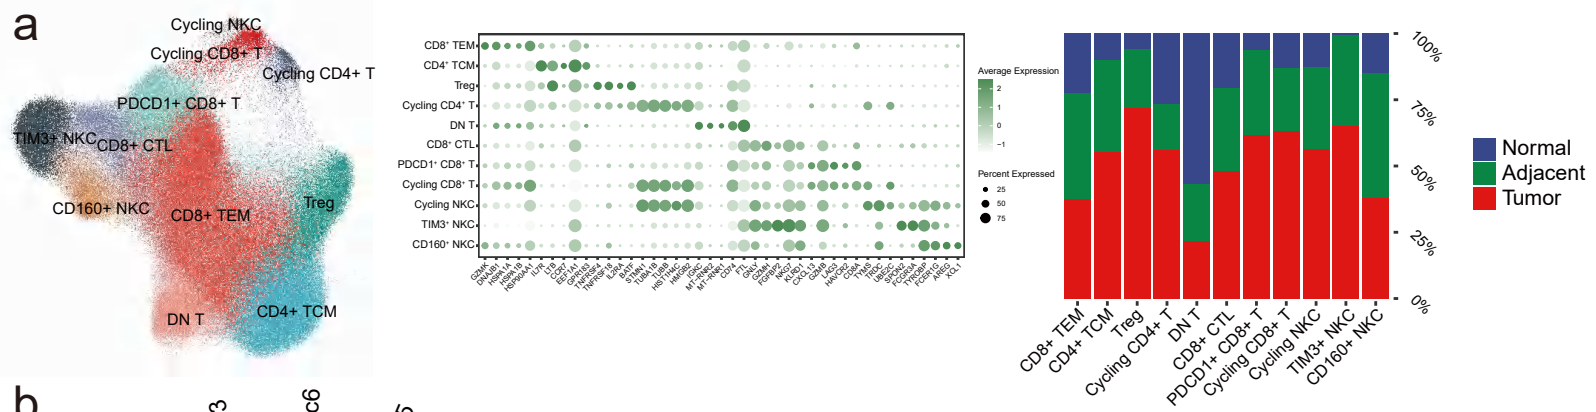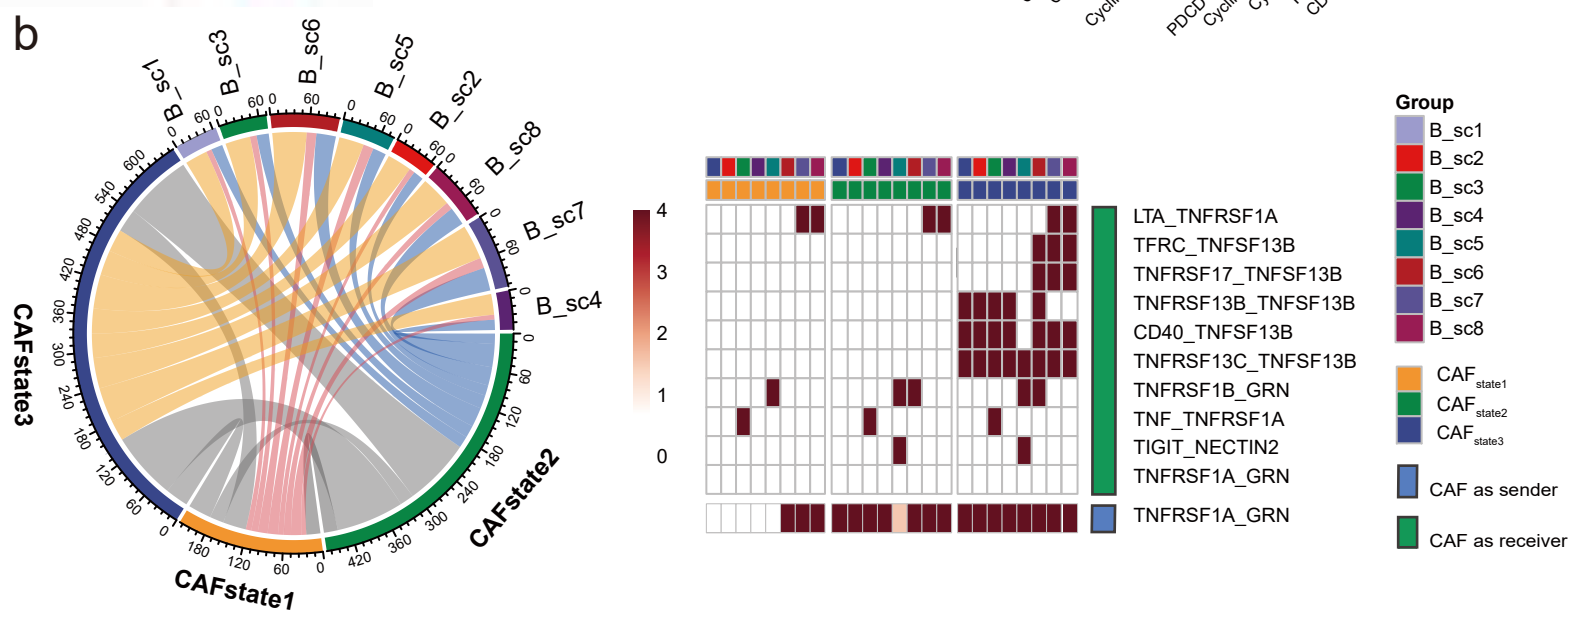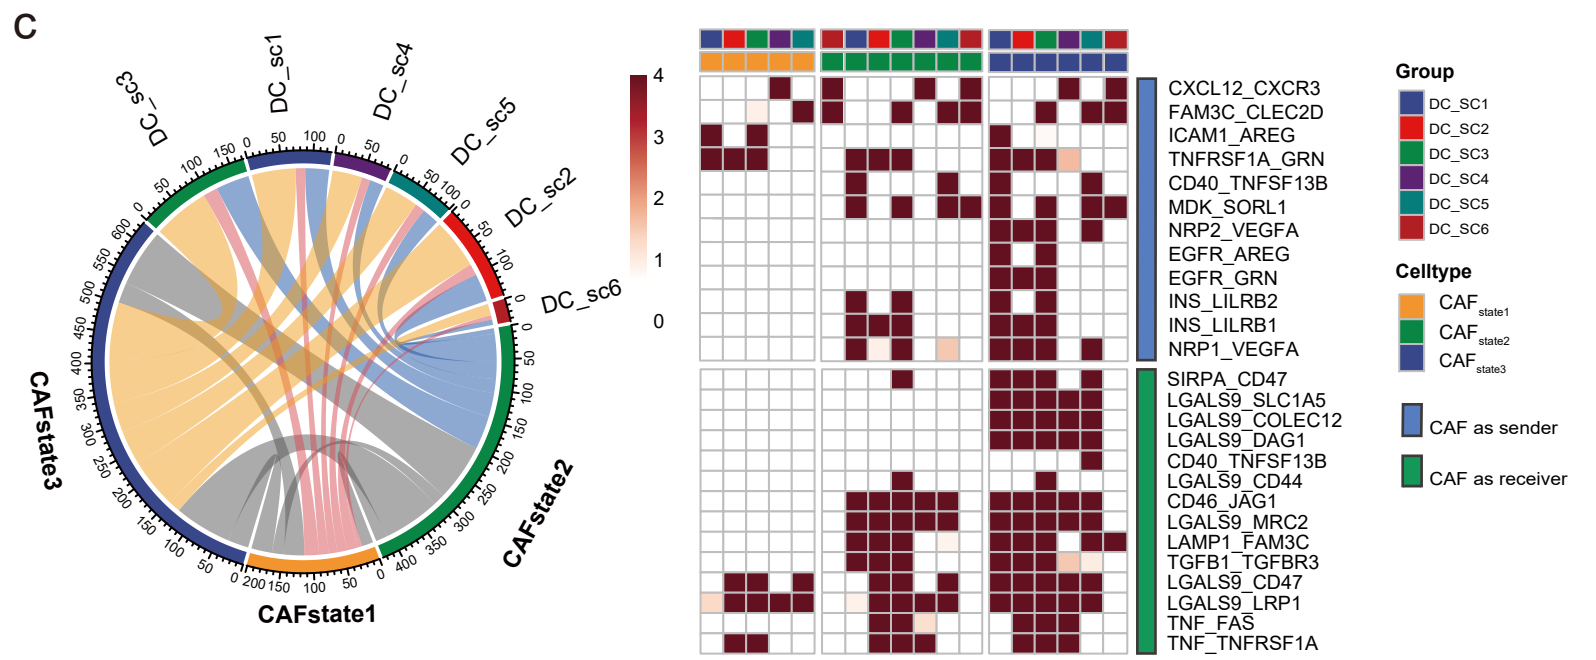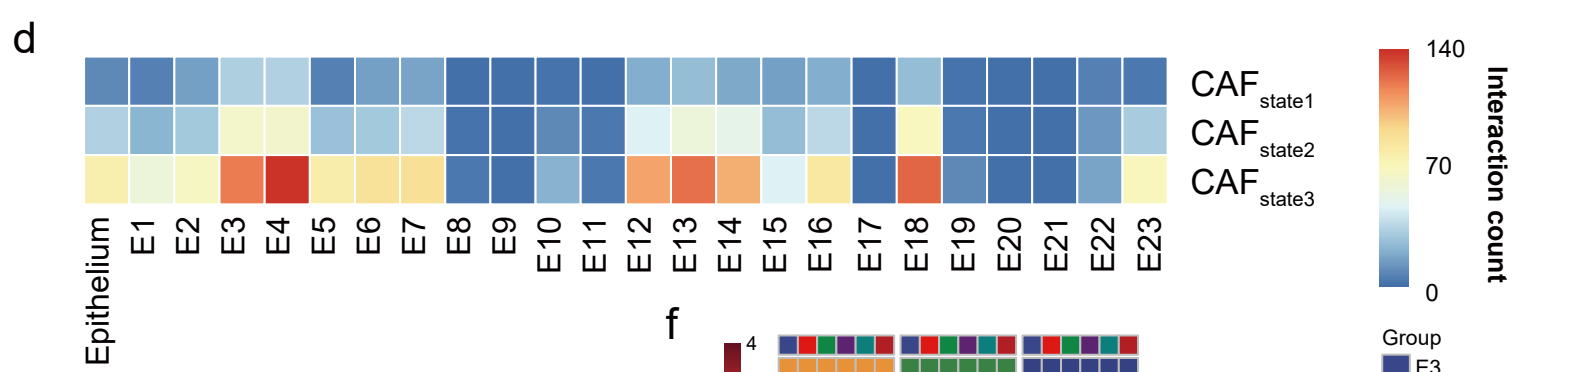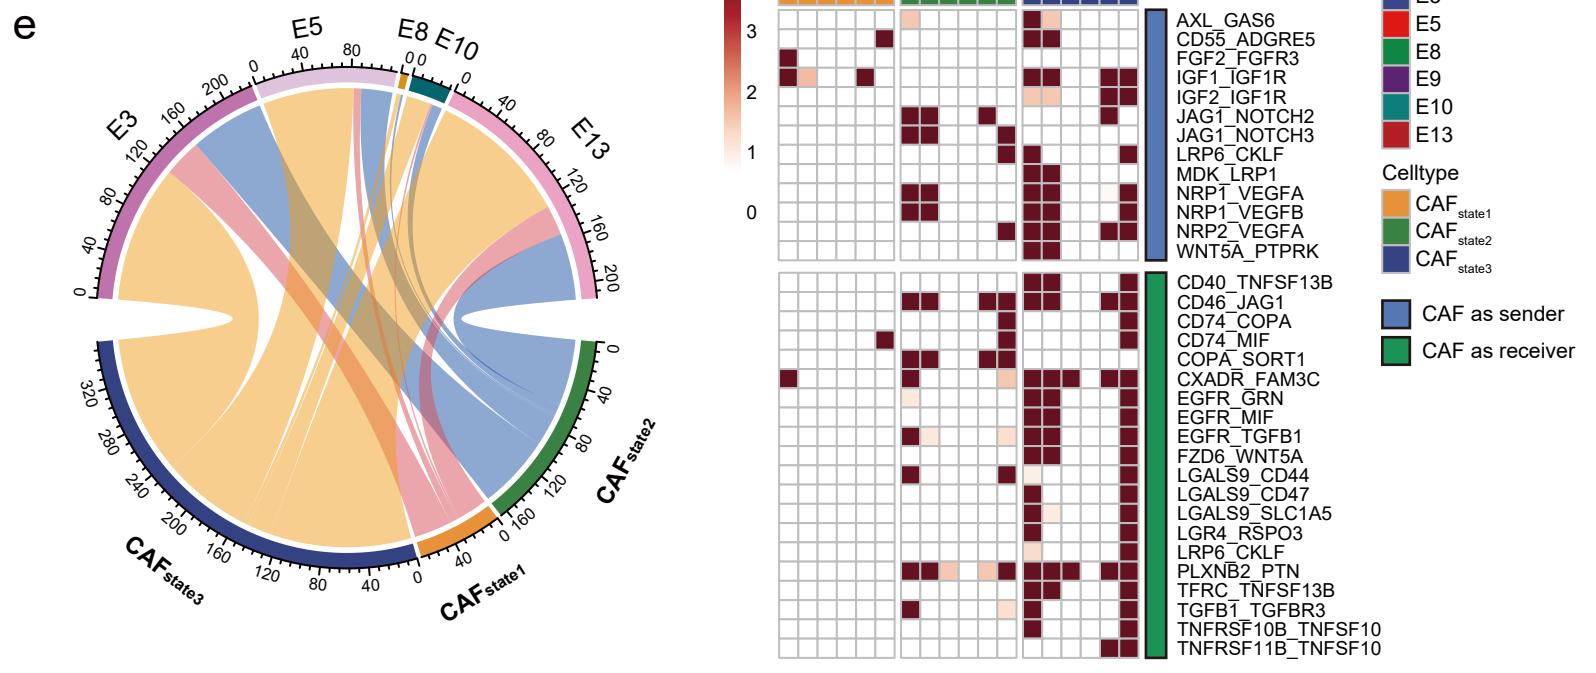

**Figure S5. Interactions of CAFs with other TME components.** **a.** Left: Clusters of NK/T cells in pan-cancer analysis. Right: bubble plot showing the specific marker genes in each cluster and the histogram of the composition proportion of each type of NK/T cell. **b.** Predicted and detailed interactions between the three CAF states and each B-cell subcluster. **c.** Predicted and detailed interaction between the three CAF states with DCs and pDCs. **d.** the heatmap of interaction between each cluster of epithelial cells and CAF state1-3. **e/f.** Predicted and detailed interactions between the three CAF states and each epithelial cluster.



a

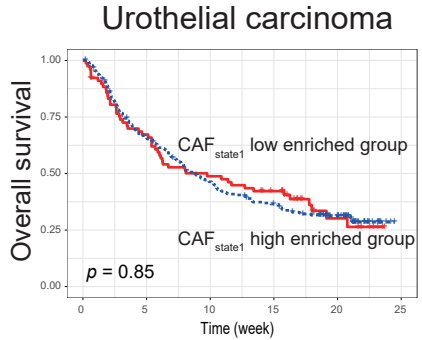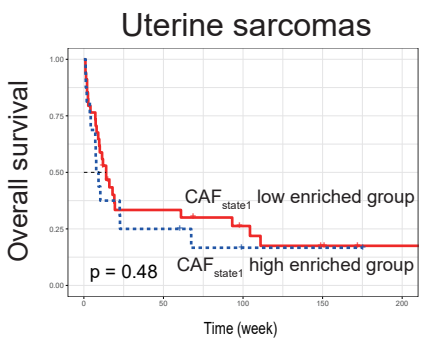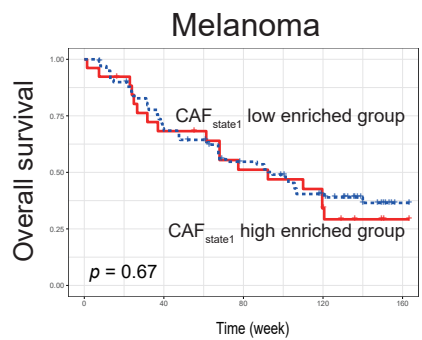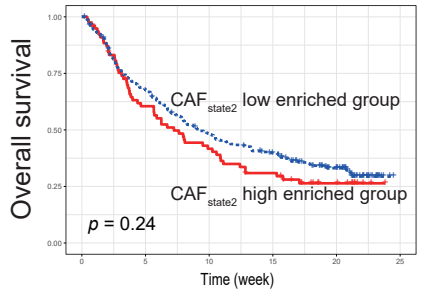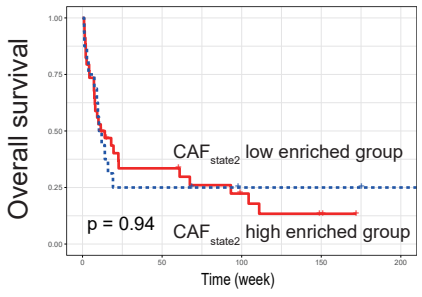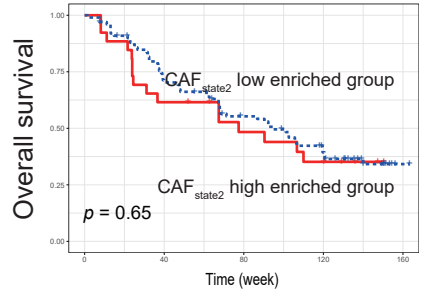

b

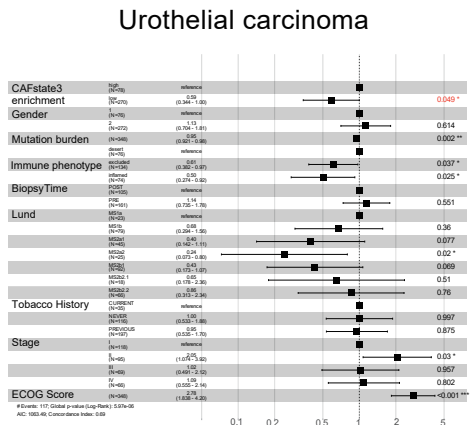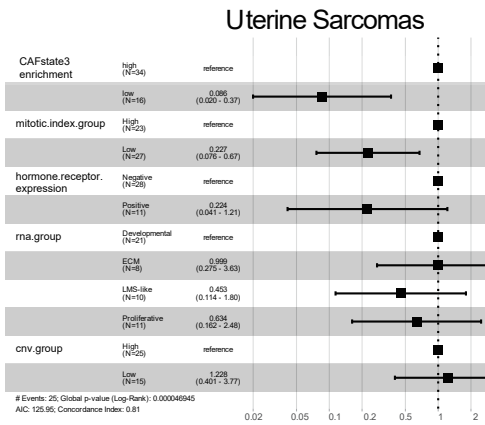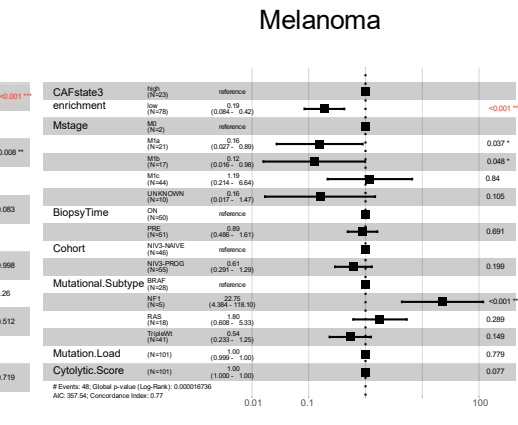

**Figure S6. Association of CAF states with immunotherapy survival outcomes. a.** Estimation of the prognostic value of the  $CAF_{state1/2}$  signature score in three immunotherapy cohorts (urothelial carcinoma, uterine sarcoma, and melanoma), Kaplan–Meier curves for overall survival in all patients according to the number of positive ligands.  $p$ -values for all survival analyses have been calculated using the log-rank test. **b.** The forest plot of multivariate adjustment results in three cohorts, Error bars represent 95% confidence intervals.

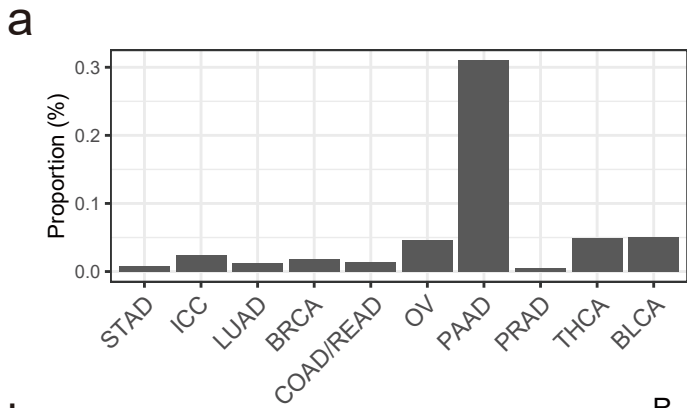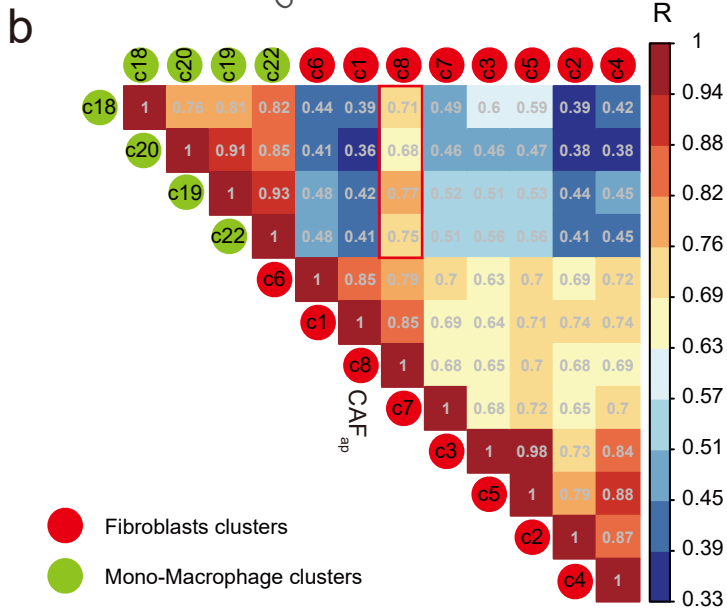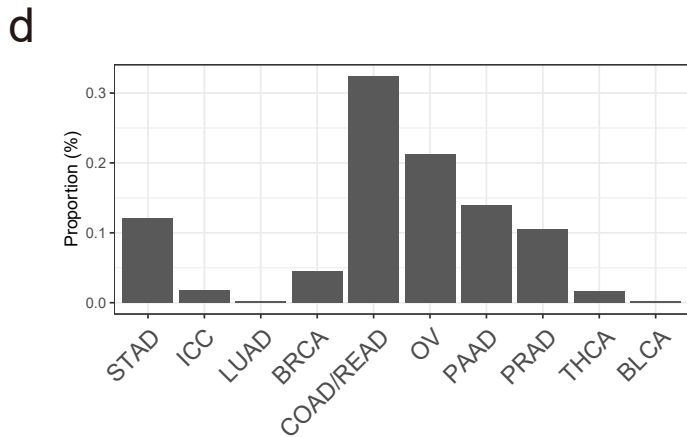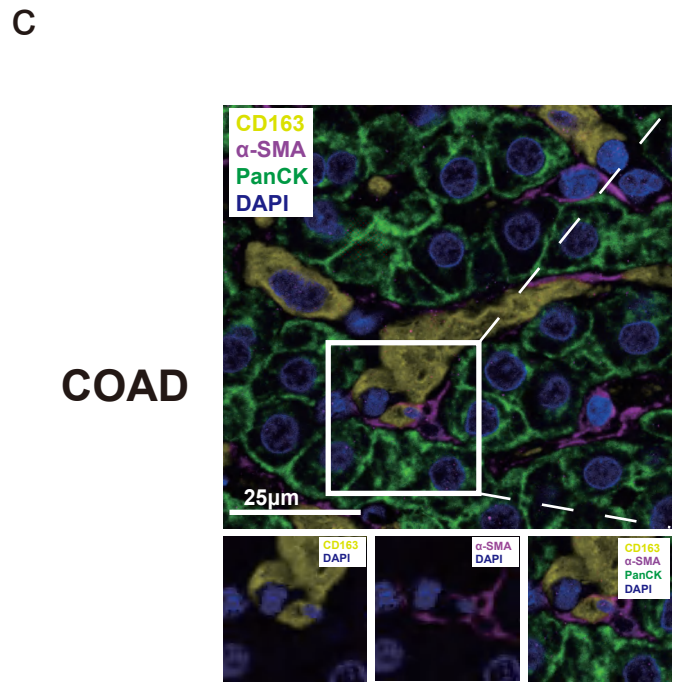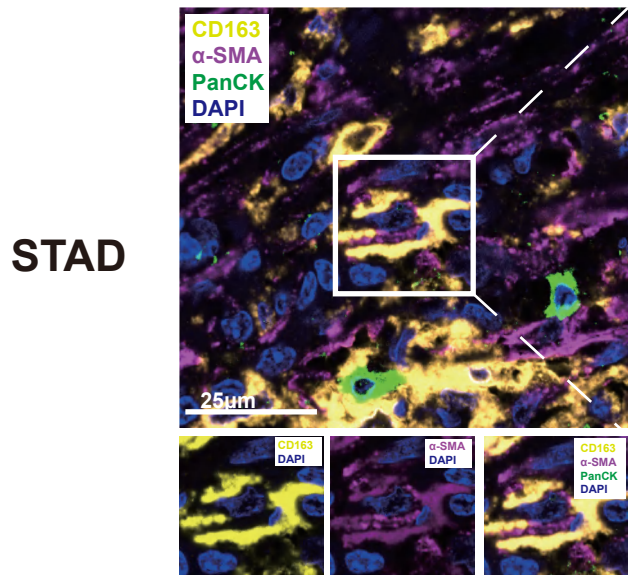

**Figure S7. Characteristics of CAF<sub>ap</sub> and CAF<sub>PN</sub>.** **a.** The absolute proportion of CAF<sub>ap</sub> to all fibroblasts in each cancer type. **b.** Genetic similarity heatmap of fibroblast-related clusters and mono-macrophage-related clusters in the TME. **c.** Confocal images of multiplexed immunofluorescence staining of PanCK,  $\alpha$ -SMA, and CD163 in colorectal and gastric cancer tissues. Multiplexed immunofluorescence assays are performed twice on tumor samples following assay optimization. **d.** The absolute proportion of CAF<sub>PN</sub> to all fibroblasts in each cancer type.

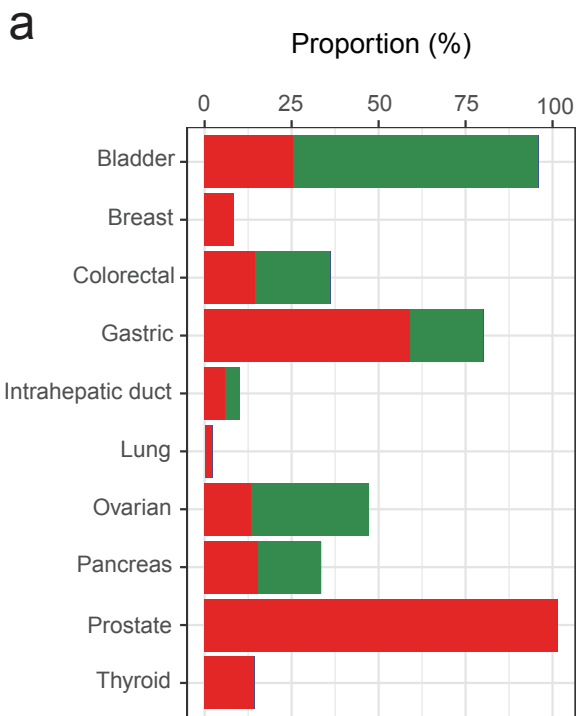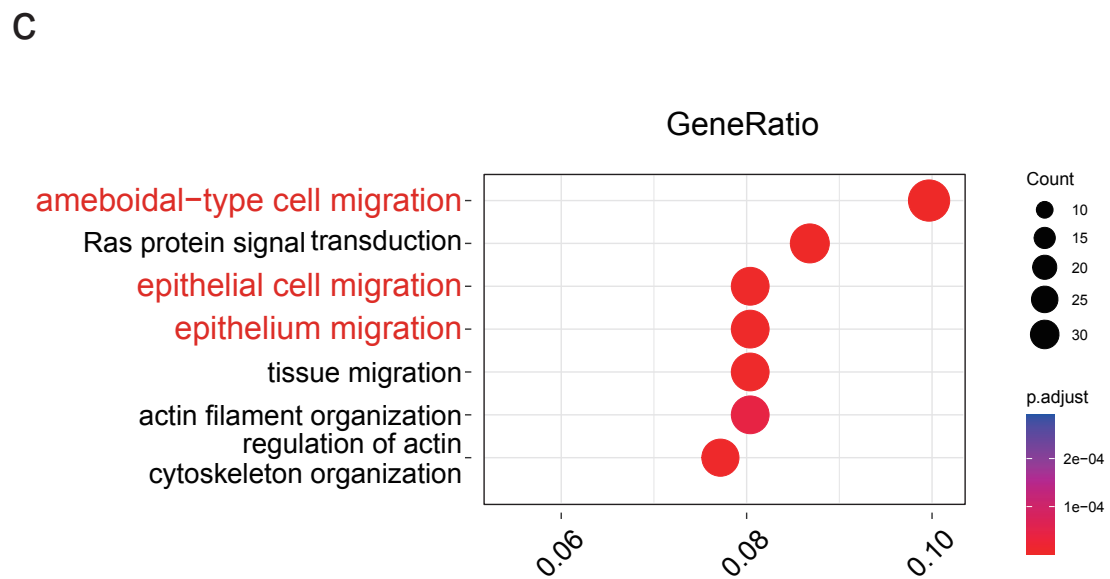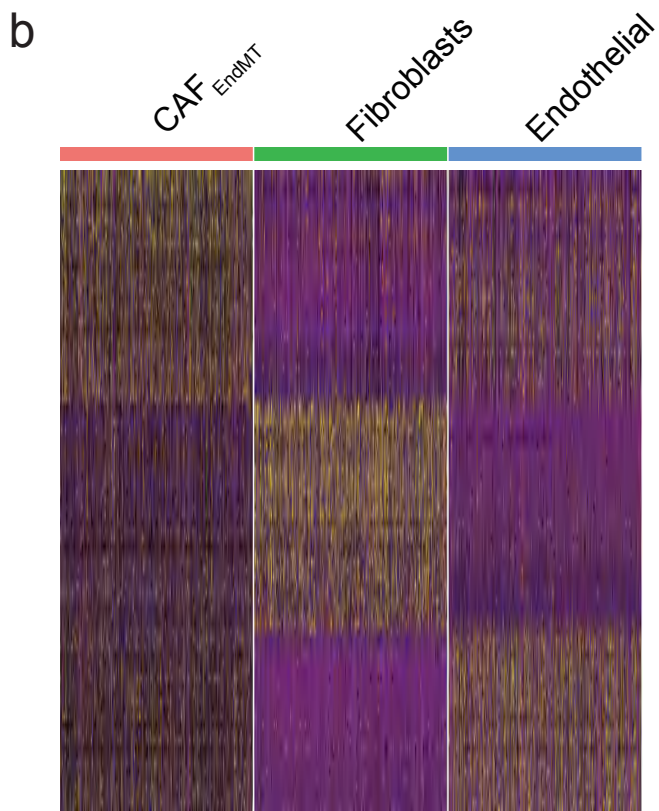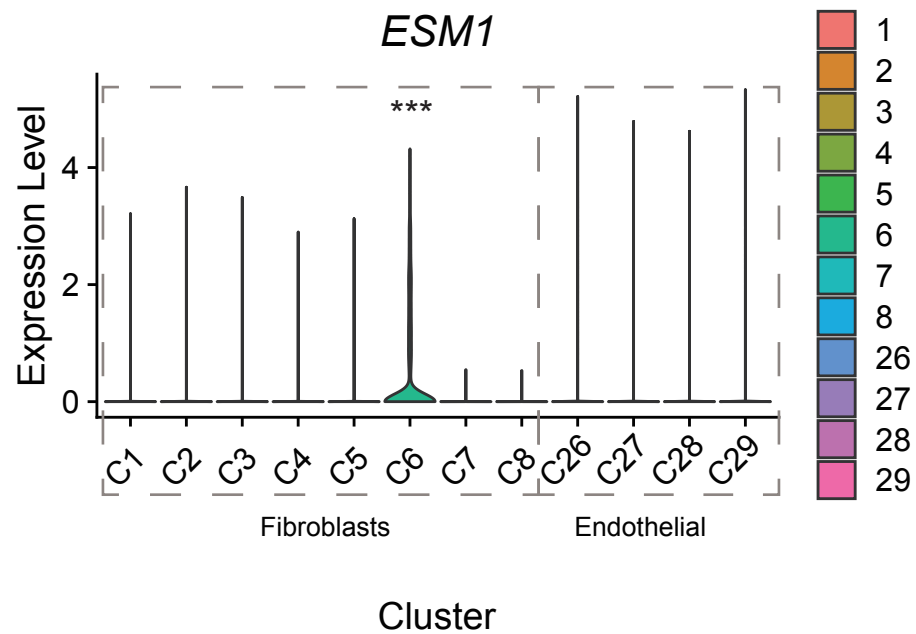

**Figure S8. Characteristics of CAF<sub>EndMT</sub>.** **a.** Histogram of the proportion of CAF<sub>EndMT</sub> in each type of cancer and cell origins. **b.** The heatmap of differentially expressed genes in CAF<sub>EndMT</sub>, all other fibroblasts and endothelial cells. Violin plot of *ESM1* in fibroblast and endothelial clusters. Kruskal-Wallis two-sided test is used to test the significance of gene expression level among different fibroblast and endothelium clusters. \*\*\*:  $p < 0.001$ . **c.** The KEGG pathway enrichment plot of CAF<sub>EndMT</sub>. FDR value is calculated by R package “clusterProfiler”.



**a**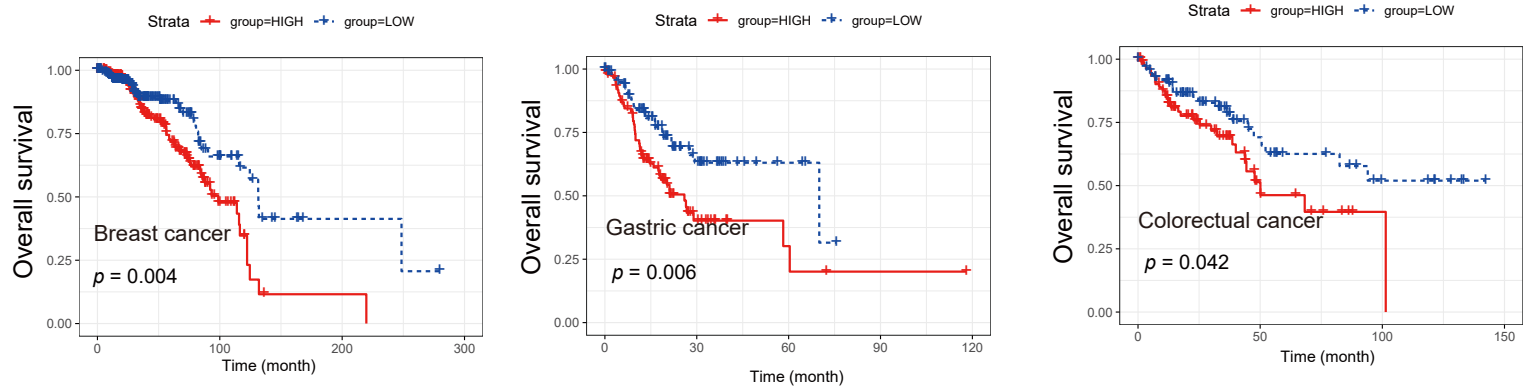**b**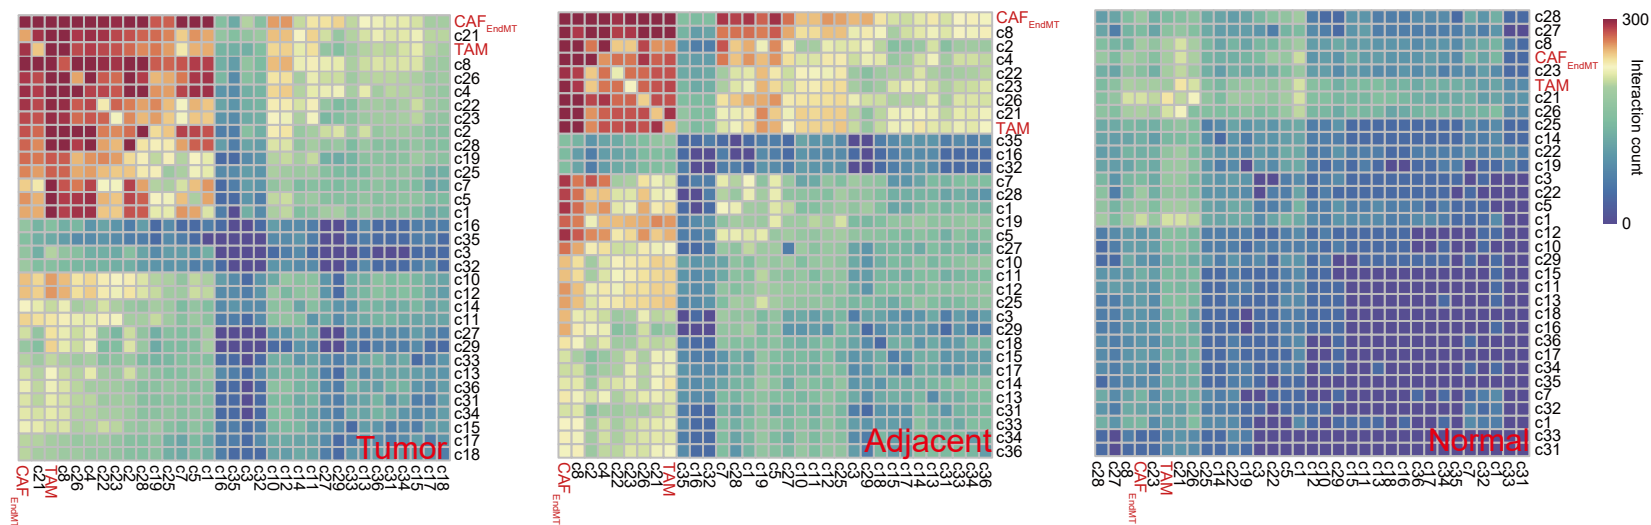**c**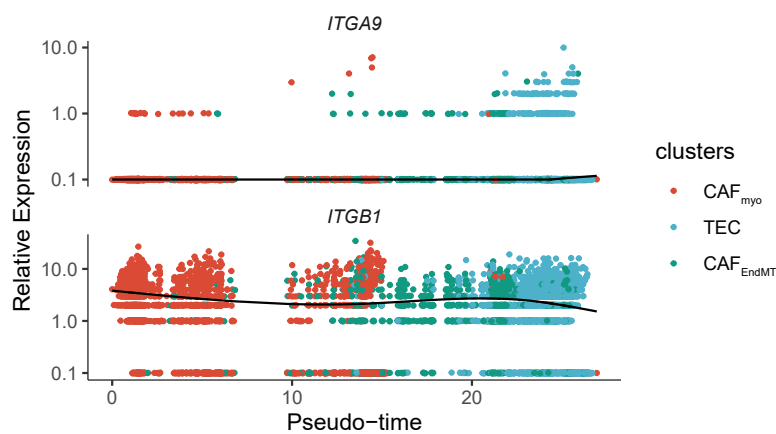**d**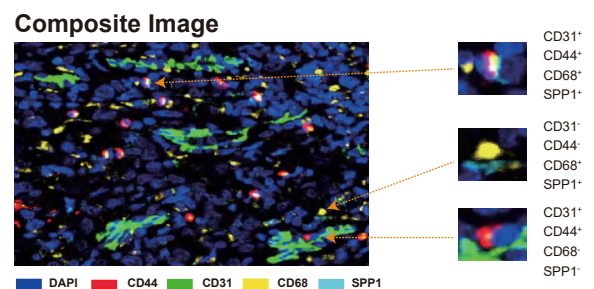**e**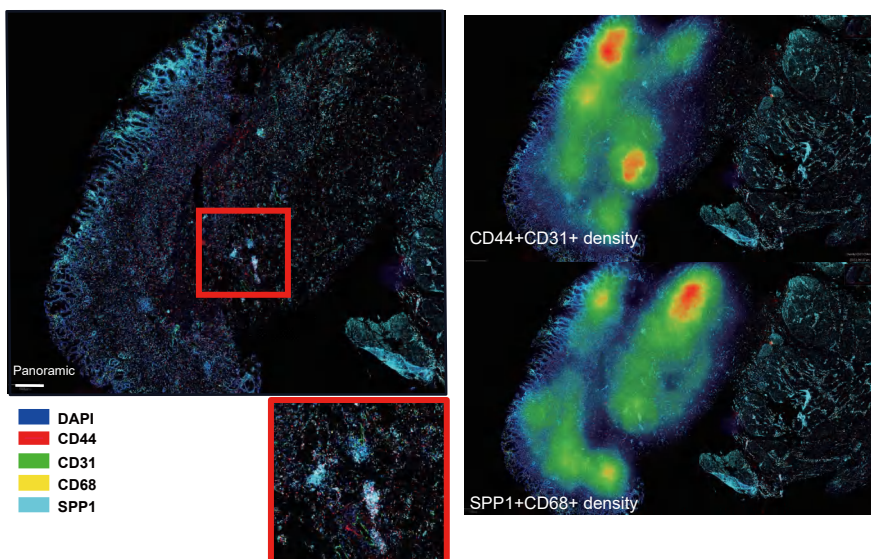

**Figure S9. Communications of CAF<sub>EndMT</sub> with other TME components.** **a.** Estimation of the prognostic value of the CAF<sub>EndMT</sub> signature in colorectal, gastric and breast cancer in terms of overall survival, Kaplan–Meier curves for overall survival in all patients according to the number of positive ligands. *p*-values for all survival analyses have been calculated using the log-rank test. **b.** The detailed interaction heatmap among TME components in normal, adjacent, and tumor tissues. **c.** Dynamic alteration of *ITGA9* and *ITGB1* along the EndMT trajectory. **d.** Illustration of the phenotype map and density map. **e.** An example of a defective region where tissues were dropped or overturned on a slide is highlighted in a red square. Scale bar: 500  $\mu\text{m}$  Multiplexed immunofluorescence assays are performed twice on tumor samples following assay optimization.

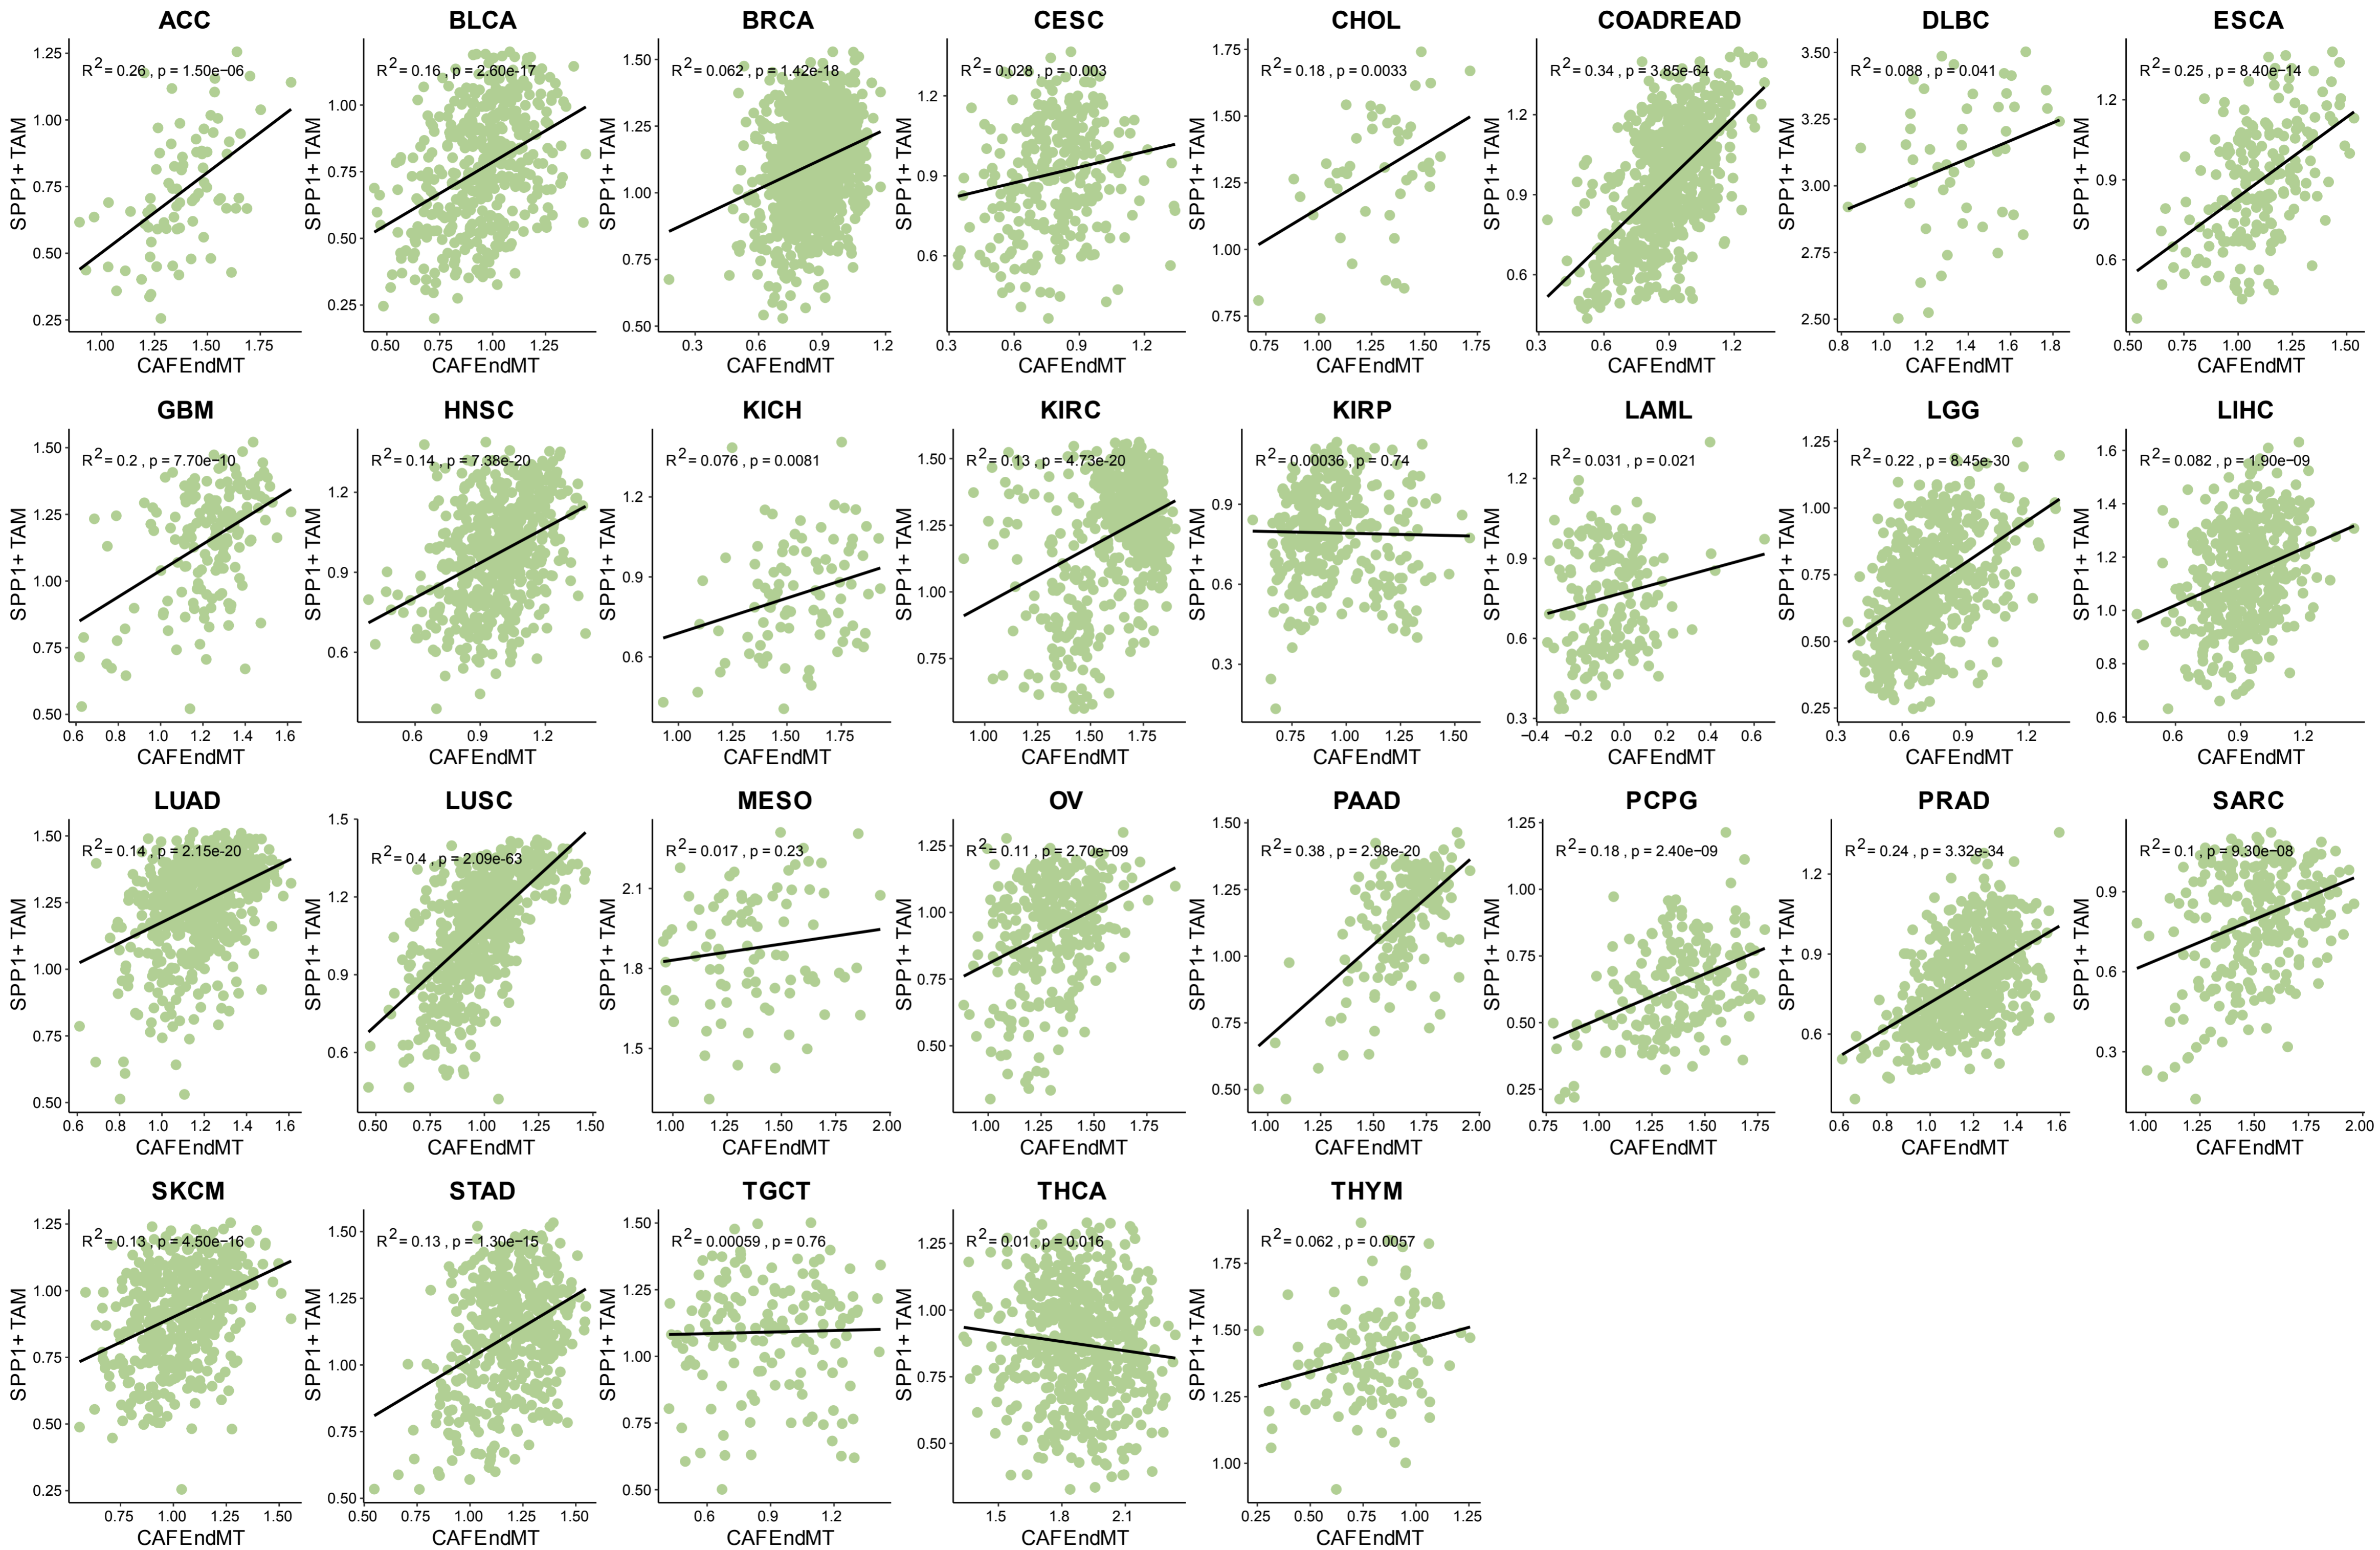

**Figure S10. Correlation of CAF<sub>EndMT</sub> with SPP1<sup>+</sup> TAM across different cancer types.** Correlation of the CAF<sub>EndMT</sub> and SPP1<sup>+</sup>TAM signature enrichment scores in various cancer types in TCGA datasets, R represents Pearson's correlation and its coefficient of determination. Significantly positive correlations were detected in most cancer types (25 of 28).
